# Supplementary material for: Assessing and mapping water-energy-food nexus smart innovations and practices in Vhembe District Municipality, Limpopo Province, South Africa
Source: Frontiers journal article supplement (doi:10.3389/frwa.2024.1253921), 2024-02-27
Supplement: Data_Sheet_1.PDF [file Data_Sheet_1.PDF]

## APPENDIX 1: QUESTIONNAIRE USED IN THE STUDY

### Table of Contents

|                                                                                     |           |
|-------------------------------------------------------------------------------------|-----------|
| <b>BACKGROUND .....</b>                                                             | <b>1</b>  |
| <b>ETHICAL CONSIDERATIONS .....</b>                                                 | <b>1</b>  |
| <b>INFORMED CONSENT.....</b>                                                        | <b>1</b>  |
| <b>INTELLECTUAL PROPERTY (IP) CONSIDERATIONS .....</b>                              | <b>1</b>  |
| <b>SECTION 1: INTERVIEW DETAILS .....</b>                                           | <b>2</b>  |
| <b>SECTION 2: DEMOGRAPHIC INFORMATION (HOUSEHOLD TYPOLOGY).....</b>                 | <b>2</b>  |
| <b>SECTION 3: A TYPOLOGY OF THE WEF NEXUS .....</b>                                 | <b>5</b>  |
| Section 3.1: Typology of Household Water Uses.....                                  | 5         |
| Section 3.2: Typology of Household Energy Uses.....                                 | 5         |
| Section 3.3: Typology of Household Agriculture Farming Systems .....                | 6         |
| Section 3.4: Typology of Food Security and Food Sufficiency .....                   | 7         |
| <b>SECTION 4: WEF TECHNOLOGICAL INNOVATIONS AND PRACTICES .....</b>                 | <b>8</b>  |
| Section 4.1: Water Technological Innovations and Practices .....                    | 8         |
| Section 4.2: Agriculture and Food Technological Innovations and Practices.....      | 9         |
| Section 4.3: Energy Innovations and Practices.....                                  | 10        |
| <b>SECTION 5: GOVERNANCE, INSTITUTIONS AND POLICY DIMENSIONS .....</b>              | <b>11</b> |
| <b>SECTION 6: ACCESS TO AND USE OF WEF RESOURCES.....</b>                           | <b>11</b> |
| Section 6.1: WEF resource use .....                                                 | 11        |
| Section 6.2: WEF resource access and use rights .....                               | 12        |
| <b>SECTION 7: FINANCIAL SUPPORT, EXTENSION AND ADOPTION.....</b>                    | <b>13</b> |
| Section 7.1: WEF financing .....                                                    | 13        |
| Section 7.2: Communication channels and extension services on WEF technologies..... | 14        |
| Section 7.3: Players in WEF technology promotion and adoption .....                 | 15        |
| Section 7.4: Factors influencing adoption of smart WEF technologies .....           | 17        |
| Section 7.5: Barriers to WEF smart technologies .....                               | 18        |
| <b>SECTION 8: WEF NEXUS TRADE-OFF AND SYNERGIES.....</b>                            | <b>19</b> |
| <b>SECTION 9: GENERAL KNOWLEDGE ON WEF NEXUS.....</b>                               | <b>19</b> |
| <b>SECTION 10: SUGGESTED ON WEF NEXUS SOLUTIONS .....</b>                           | <b>19</b> |

## BACKGROUND

This document presents the research data collection tools for Water Research Commission (WRC) funded project titled “Integrating water-energy-food (WEF) nexus innovations and practices into policy, governance and institutional frameworks for sustainable development in Vhembe District Municipality, Limpopo Province, South Africa”. Motar and Daher (2016)<sup>1</sup> posit that WEF nexus research should include local level stakeholders. Therefore, this research seeks support the decision-making process of the nexus assessment by collecting new knowledge which is context specific (Melloni et al., 2020<sup>2</sup>)

## ETHICAL CONSIDERATIONS

The project will respect at its core the five ethical principles that researchers need to adhere to:

- a) obtain informed consent from potential research participants;
- b) minimize the risk of harm to participants;
- c) protect the participants’ anonymity and confidentiality;
- d) avoid using deceptive practices; and
- e) give participants the right to withdraw from your research.

In addition to the five “gold” standard principles, integrity and transparency shall be vital in our research.

## INFORMED CONSENT

The human subjects in any research project must participate willingly, having been adequately informed about the research. Informed consent in our study will entail a process of telling potential research participants about the key elements of the research study and what their participation will involve. The consent process will also include providing a written consent document containing the required information (See Annex A) for the proposed Consent Form) and the presentation of that information to prospective participants to concur.

## INTELLECTUAL PROPERTY (IP) CONSIDERATIONS

With regard to intellectual property (IP), data collected, data collection tool and reports of this study shall be an intellectual property of the WRC. This will be guided by the Intellectual Property Rights from Publicly Financed Research and Development Act 51 of 2008 (IP Act) (Republic of South Africa, 2008).

---

<sup>1</sup> Rabi H. Mohtar & Bassel Daher (2016) Water-Energy-Food Nexus Framework for facilitating multi-stakeholder dialogue, Water International, 41:5, 655-661, DOI: [10.1080/02508060.2016.1149759](https://doi.org/10.1080/02508060.2016.1149759)

<sup>2</sup> Melloni et al., 2020. A Stakeholder Analysis for a Water-Energy-Food Nexus Evaluation in an Atlantic Forest Area: Implications for an Integrated Assessment and a Participatory Approach.

## SECTION 1: INTERVIEW DETAILS

This Section is designed to gather information about the study respondents (and/or participants). Respondents are those persons who will be invited to participate in this research study and have actually taken part in the study.

| Numbering | Required to fill-in/Question              | Instruction                                                                                                                                                                                           |
|-----------|-------------------------------------------|-------------------------------------------------------------------------------------------------------------------------------------------------------------------------------------------------------|
|           | Supervisor's Name                         | Indicate the name of the supervisor                                                                                                                                                                   |
|           | Enumerator's Name                         | Indicate name of the supervisor                                                                                                                                                                       |
|           | Supervisor's Check Date                   | yyyy-mm-dd<br>To be completed by supervisor                                                                                                                                                           |
|           | Name of the Respondent                    | Type in Name and Surname                                                                                                                                                                              |
|           | Respondent's Household (HH) Status        | Choose from: <ul style="list-style-type: none"><li>- Household Head</li><li>- Spouse</li><li>- Child</li><li>- Relative</li></ul>                                                                     |
|           | Gender of the Head of the Respondent      | Choose from: <ul style="list-style-type: none"><li>- Male</li><li>- Female</li><li>- Prefer not to say</li></ul>                                                                                      |
|           | Age category of the Respondent            | Choose from: <ul style="list-style-type: none"><li>- 20 and under</li><li>- 21-30</li><li>- 31-40</li><li>- 41-50</li><li>- 51-60</li><li>- Above 60</li></ul>                                        |
|           | Highest Education Level of the Respondent | Choose from: <ul style="list-style-type: none"><li>- No schooling</li><li>- Primary Education</li><li>- Secondary Education</li><li>- TVET/College Education</li><li>- University Education</li></ul> |
|           | Employment Status of the Respondent       | Ask if the respondent is employed: <ul style="list-style-type: none"><li>- Yes</li><li>- No</li><li>- Self employed</li></ul>                                                                         |
|           |                                           | If YES, type in the form of employment <sup>3</sup> (i.e., teacher, nurse, shop steward, etc.)                                                                                                        |
|           |                                           | Also, indicate if it is <sup>4</sup> : <ul style="list-style-type: none"><li>- Formal</li><li>- Informal</li></ul>                                                                                    |

## SECTION 2: DEMOGRAPHIC INFORMATION (HOUSEHOLD TYPOLOGY)

The collected demographic information in this Section will allow the Research Team to better understand certain background characteristics of an audience, whether it's their age, race, ethnicity, income, work situation, marital status, etc.

---

<sup>3</sup> Employment means the state of having a paid job.

<sup>4</sup> Formal employment is recognised of workers with social security benefits provided by the employer, while informal employment refers to its absence.

| Numbering                                                                                                                                                                                                                                                                                                                                         | Required to fill-in/Question                                                                                                                                                                                                                                                                                                            | Instruction                                                                                                                                                                                                                                                                                                                                                                                                                                                                                                                                                                                                                                                                                                                                                                               |        |            |                                                                                                                                                                                                                                                                                                                                                   |                                                                                                                                                                                                                                      |
|---------------------------------------------------------------------------------------------------------------------------------------------------------------------------------------------------------------------------------------------------------------------------------------------------------------------------------------------------|-----------------------------------------------------------------------------------------------------------------------------------------------------------------------------------------------------------------------------------------------------------------------------------------------------------------------------------------|-------------------------------------------------------------------------------------------------------------------------------------------------------------------------------------------------------------------------------------------------------------------------------------------------------------------------------------------------------------------------------------------------------------------------------------------------------------------------------------------------------------------------------------------------------------------------------------------------------------------------------------------------------------------------------------------------------------------------------------------------------------------------------------------|--------|------------|---------------------------------------------------------------------------------------------------------------------------------------------------------------------------------------------------------------------------------------------------------------------------------------------------------------------------------------------------|--------------------------------------------------------------------------------------------------------------------------------------------------------------------------------------------------------------------------------------|
|                                                                                                                                                                                                                                                                                                                                                   | Indicate Village Location                                                                                                                                                                                                                                                                                                               | Municipality ward within Vhembe with reference to pilot site                                                                                                                                                                                                                                                                                                                                                                                                                                                                                                                                                                                                                                                                                                                              |        |            |                                                                                                                                                                                                                                                                                                                                                   |                                                                                                                                                                                                                                      |
|                                                                                                                                                                                                                                                                                                                                                   | Indicate Village Name                                                                                                                                                                                                                                                                                                                   | Village with reference to pilot site                                                                                                                                                                                                                                                                                                                                                                                                                                                                                                                                                                                                                                                                                                                                                      |        |            |                                                                                                                                                                                                                                                                                                                                                   |                                                                                                                                                                                                                                      |
|                                                                                                                                                                                                                                                                                                                                                   | How many members live in this household including you?                                                                                                                                                                                                                                                                                  | Choose from pre-programmed numbers                                                                                                                                                                                                                                                                                                                                                                                                                                                                                                                                                                                                                                                                                                                                                        |        |            |                                                                                                                                                                                                                                                                                                                                                   |                                                                                                                                                                                                                                      |
|                                                                                                                                                                                                                                                                                                                                                   |                                                                                                                                                                                                                                                                                                                                         |                                                                                                                                                                                                                                                                                                                                                                                                                                                                                                                                                                                                                                                                                                                                                                                           |        |            |                                                                                                                                                                                                                                                                                                                                                   |                                                                                                                                                                                                                                      |
|                                                                                                                                                                                                                                                                                                                                                   | Household Physical Assets: What are the assets within the household?                                                                                                                                                                                                                                                                    | Select water related assets                                                                                                                                                                                                                                                                                                                                                                                                                                                                                                                                                                                                                                                                                                                                                               |        |            |                                                                                                                                                                                                                                                                                                                                                   |                                                                                                                                                                                                                                      |
|                                                                                                                                                                                                                                                                                                                                                   | ➔ Select = ticking from pre-programmed list. Multiple entries are allowed.                                                                                                                                                                                                                                                              | Select energy related assets (i.e., what does the HH use for lighting): <ul style="list-style-type: none"><li>- Biomass (Firewood, animal dung etc)</li><li>- Battery powered light/lamp</li><li>- Paraffin</li><li>- Electricity</li><li>- Solar</li><li>- Generator</li><li>- Other, name:</li><li>- What does the HH use for heating (space heating, water heating etc)</li><li>- Biomass (Firewood, animal dung etc)</li><li>- Paraffin</li><li>- Electricity</li><li>- Solar water heaters</li><li>- Liquid Petroleum Gas (LP Gas)</li><li>- Other (specify)</li><li>- What does the HH use for cooking?</li><li>- Biomass (Firewood, animal dung etc)</li><li>- Paraffin</li><li>- Electricity</li><li>- Liquid petroleum gas (LPGas)</li><li>- Other (specify)</li><li>-</li></ul> |        |            |                                                                                                                                                                                                                                                                                                                                                   |                                                                                                                                                                                                                                      |
|                                                                                                                                                                                                                                                                                                                                                   |                                                                                                                                                                                                                                                                                                                                         | Select agriculture production related assets                                                                                                                                                                                                                                                                                                                                                                                                                                                                                                                                                                                                                                                                                                                                              |        |            |                                                                                                                                                                                                                                                                                                                                                   |                                                                                                                                                                                                                                      |
|                                                                                                                                                                                                                                                                                                                                                   |                                                                                                                                                                                                                                                                                                                                         | <table><tr><th>Crops:</th><th>Livestock:</th></tr><tr><td><ul style="list-style-type: none"><li>- Spade</li><li>- Digging fork</li><li>- Rake</li><li>- Han Hoe</li><li>- Home ox-drawn farm implements (e.g., plough, cultivator, ridger, cart)</li><li>- Tractor</li><li>- Home garden</li><li>- Field within HH</li><li>- Filed outside HH</li><li>- Commercial orchard</li><li>- Other, name:</li></ul></td><td><ul style="list-style-type: none"><li>- Chickens</li><li>- Commercial Poultry</li><li>- Small stock - goats</li><li>- Small stock - sheep)</li><li>-</li><li>- Cattle – Beef</li><li>- Cattle Dairy</li><li>- Other, name:</li></ul></td></tr></table>                                                                                                                | Crops: | Livestock: | <ul style="list-style-type: none"><li>- Spade</li><li>- Digging fork</li><li>- Rake</li><li>- Han Hoe</li><li>- Home ox-drawn farm implements (e.g., plough, cultivator, ridger, cart)</li><li>- Tractor</li><li>- Home garden</li><li>- Field within HH</li><li>- Filed outside HH</li><li>- Commercial orchard</li><li>- Other, name:</li></ul> | <ul style="list-style-type: none"><li>- Chickens</li><li>- Commercial Poultry</li><li>- Small stock - goats</li><li>- Small stock - sheep)</li><li>-</li><li>- Cattle – Beef</li><li>- Cattle Dairy</li><li>- Other, name:</li></ul> |
| Crops:                                                                                                                                                                                                                                                                                                                                            |                                                                                                                                                                                                                                                                                                                                         | Livestock:                                                                                                                                                                                                                                                                                                                                                                                                                                                                                                                                                                                                                                                                                                                                                                                |        |            |                                                                                                                                                                                                                                                                                                                                                   |                                                                                                                                                                                                                                      |
| <ul style="list-style-type: none"><li>- Spade</li><li>- Digging fork</li><li>- Rake</li><li>- Han Hoe</li><li>- Home ox-drawn farm implements (e.g., plough, cultivator, ridger, cart)</li><li>- Tractor</li><li>- Home garden</li><li>- Field within HH</li><li>- Filed outside HH</li><li>- Commercial orchard</li><li>- Other, name:</li></ul> |                                                                                                                                                                                                                                                                                                                                         | <ul style="list-style-type: none"><li>- Chickens</li><li>- Commercial Poultry</li><li>- Small stock - goats</li><li>- Small stock - sheep)</li><li>-</li><li>- Cattle – Beef</li><li>- Cattle Dairy</li><li>- Other, name:</li></ul>                                                                                                                                                                                                                                                                                                                                                                                                                                                                                                                                                      |        |            |                                                                                                                                                                                                                                                                                                                                                   |                                                                                                                                                                                                                                      |
|                                                                                                                                                                                                                                                                                                                                                   | Food storage, processing or preservation (i.e., post-harvest loss management): <ul style="list-style-type: none"><li>- Fridge/Freezer</li><li>- Stove (charcoal, firestone, biogas, paraffin, electricity)</li><li>- Sun drier</li><li>- Grinder/ HH miller</li><li>- Household grain storage facility</li><li>- Other, name:</li></ul> |                                                                                                                                                                                                                                                                                                                                                                                                                                                                                                                                                                                                                                                                                                                                                                                           |        |            |                                                                                                                                                                                                                                                                                                                                                   |                                                                                                                                                                                                                                      |
|                                                                                                                                                                                                                                                                                                                                                   | ICT/Information access and related assets: <ul style="list-style-type: none"><li>- Telephone line</li><li>- Cellphone Network Access</li><li>- TV</li></ul>                                                                                                                                                                             |                                                                                                                                                                                                                                                                                                                                                                                                                                                                                                                                                                                                                                                                                                                                                                                           |        |            |                                                                                                                                                                                                                                                                                                                                                   |                                                                                                                                                                                                                                      |

|  |                                            |                                                        |
|--|--------------------------------------------|--------------------------------------------------------|
|  |                                            | - Radio                                                |
|  | Indicate other WEF related assets, if any. | Type in as required<br>➔ Multiple entries are allowed. |

### SECTION 3: A TYPOLOGY OF THE WEF NEXUS

The purpose of this Section is to characterize the Water, Energy and Food (Agriculture) nexus elements. To provide context, in this Section, we will collect data to assist describe concretely what is happening (i.e., the current situation of the WEF elements within the pilot sites). This will then make it easy for the reader to have a better understanding of the background and the results of the research.

#### Section 3.1: Typology of Household Water Uses

| Numbering | Required to fill-in/Question                                                         | Instruction                                                                                                                                                                                                                                                                                                                                                                                                                                                     |
|-----------|--------------------------------------------------------------------------------------|-----------------------------------------------------------------------------------------------------------------------------------------------------------------------------------------------------------------------------------------------------------------------------------------------------------------------------------------------------------------------------------------------------------------------------------------------------------------|
|           | Indicate the source of household water?<br>→ some questions will have sub-questions. | Choose from (multiple entries allowed):<br><ul style="list-style-type: none"> <li>- Household Municipal Tap</li> <li>- Communal Municipal Tap</li> <li>- Household Borehole (→ indicate the source of energy used pump water)</li> <li>- Communal Borehole (→ indicate the source of energy used pump water)</li> <li>- Fountain</li> <li>- River stream (→ indicate the mechanism used to draw or transfer water)</li> <li>- Rainwater</li> </ul> Other, name: |
|           | For each selected source, indicate water treatment method.                           | Choose from:<br><ul style="list-style-type: none"> <li>- Household boiling</li> <li>- Household chlorine treatment</li> <li>- Central chlorine treatment</li> <li>- Other, name:</li> </ul>                                                                                                                                                                                                                                                                     |
|           | For each selected source, indicate if water is paid for.                             | Choose from:<br><ul style="list-style-type: none"> <li>- Paid</li> <li>- Not paid</li> </ul>                                                                                                                                                                                                                                                                                                                                                                    |
|           | For each selected source, indicate location/distance to water source.                | Choose from:<br><ul style="list-style-type: none"> <li>- Within the HH</li> <li>- Within 1 KM of the HH</li> <li>- Beyond 1 KM of the HH</li> </ul>                                                                                                                                                                                                                                                                                                             |
|           | Indicate the main use of water by the household                                      | Choose from:<br><ul style="list-style-type: none"> <li>- HH consumption and use</li> <li>- Vegetable husbandry</li> <li>- Livestock husbandry</li> <li>- Other commercial activity, name:</li> </ul>                                                                                                                                                                                                                                                            |
|           | Indicate consistency of water supply (if there are cut off) affecting WEF nexus      | Are cut-off happening:<br><ul style="list-style-type: none"> <li>- Daily</li> <li>- Once a week</li> <li>- Once a month</li> <li>- Never</li> </ul>                                                                                                                                                                                                                                                                                                             |
|           | Other, please specify                                                                |                                                                                                                                                                                                                                                                                                                                                                                                                                                                 |

#### Section 3.2: Typology of Household Energy Uses

| Numbering | Required to fill-in/Question                                                         | Instruction                                                                                                                                                                                                                                                                                                               |
|-----------|--------------------------------------------------------------------------------------|---------------------------------------------------------------------------------------------------------------------------------------------------------------------------------------------------------------------------------------------------------------------------------------------------------------------------|
|           | Indicate the type of household energy used (at HH level and/or field outside the HH) | Choose from<br><ul style="list-style-type: none"> <li>- Biomass (Fuelwood, animal dung, biogas etc)</li> <li>- Eskom/Municipality electricity</li> <li>- Paraffin</li> <li>- Liquid petroleum gas</li> <li>- Renewable energy technologies (solar panels, solar water heaters etc.)</li> <li>- Other (specify)</li> </ul> |
|           | For each selected type, indicate the source/supplier of each.                        | Choose from<br><ul style="list-style-type: none"> <li>- Eskom</li> <li>- Municipality</li> <li>- Self</li> </ul>                                                                                                                                                                                                          |

|  |                                                                              |                                                                                                                                                                                                                                                                             |
|--|------------------------------------------------------------------------------|-----------------------------------------------------------------------------------------------------------------------------------------------------------------------------------------------------------------------------------------------------------------------------|
|  |                                                                              | <ul style="list-style-type: none"> <li>- Other (Specify)</li> <li>-</li> </ul>                                                                                                                                                                                              |
|  | For each selected source, source indicate if that energy is paid for.        | Choose from: <ul style="list-style-type: none"> <li>- Paid</li> <li>- Not paid</li> </ul>                                                                                                                                                                                   |
|  | For each selected type, indicate the main use of each mentioned energy type. | Choose from <ul style="list-style-type: none"> <li>- Heating (water, pottery, space)</li> <li>- Lighting</li> <li>- Cooking</li> <li>- Cooling</li> <li>- Refrigeration</li> <li>- Television</li> <li>- Charging computers and other devices such as cellphones</li> </ul> |
|  | Indicate if there are any energy supply disruptions that affect WEF nexus    | Choose from: <ul style="list-style-type: none"> <li>--Load shedding</li> <li>Shortage at source or supplier</li> <li>Other (specify)</li> </ul>                                                                                                                             |
|  | Other, specify                                                               |                                                                                                                                                                                                                                                                             |
|  |                                                                              |                                                                                                                                                                                                                                                                             |

### Section 3.3: Typology of Household Agriculture Farming Systems

| Numbering | Required to fill-in/Question | Instruction                                                                                                                                                                                                                                                                                                                                                                                                                                                                                                                                                                                                                                                                                  |
|-----------|------------------------------|----------------------------------------------------------------------------------------------------------------------------------------------------------------------------------------------------------------------------------------------------------------------------------------------------------------------------------------------------------------------------------------------------------------------------------------------------------------------------------------------------------------------------------------------------------------------------------------------------------------------------------------------------------------------------------------------|
|           | Agro-ecological zone         | Choose from <ul style="list-style-type: none"> <li>-</li> </ul>                                                                                                                                                                                                                                                                                                                                                                                                                                                                                                                                                                                                                              |
|           | Crop Farming System          | <ul style="list-style-type: none"> <li>- Type of Crops; for each:</li> <li>- Form of production               <ul style="list-style-type: none"> <li>o Irrigated/Dryland</li> <li>o Inside/outside homestead</li> <li>o Subsistence/commercial</li> <li>o Labor provision (HH/hired)</li> </ul> </li> <li>- Post-harvest activities               <ul style="list-style-type: none"> <li>o Form of storage</li> <li>o Form of value-addition</li> <li>o Form of preservation</li> </ul> </li> <li>- Marketing channels</li> <li>- The importance of <u>water</u> to the farming system</li> <li>- Importance of <u>energy</u> to the farming system</li> <li>- Total size of land</li> </ul> |
|           | Horticulture Farming System  | <ul style="list-style-type: none"> <li>- Type of fruit trees farmed, for each:</li> <li>- Production system</li> <li>- Intensive/extensive</li> <li>- Subsistence/commercial</li> <li>- Labor provision (HH/hired)</li> <li>- Marketing channels</li> <li>- The importance of <u>water</u> to the farming system</li> <li>- Importance of <u>energy</u> to the farming system</li> <li>- Total size of land</li> </ul>                                                                                                                                                                                                                                                                       |
|           | Livestock Farming System     | <ul style="list-style-type: none"> <li>- Type of livestock farmed, for each:</li> <li>- Production system               <ul style="list-style-type: none"> <li>o Intensive/extensive</li> <li>o Subsistence/commercial</li> <li>o Labor provision (HH/hired)</li> </ul> </li> <li>- Marketing channels</li> <li>- The importance of <u>water</u> to the farming system</li> <li>- Importance of <u>energy</u> to the farming system</li> <li>- Herd sizes</li> </ul>                                                                                                                                                                                                                         |
|           | Other, please specify        |                                                                                                                                                                                                                                                                                                                                                                                                                                                                                                                                                                                                                                                                                              |

### Section 3.4: Typology of Food Security and Food Sufficiency

→ this is a gold standard tool use.

| Numbering | Required to fill-in/Question                                                                                                                                | Instruction                                                                                                                                                                                                                                                                                                                                                                                                                                           |
|-----------|-------------------------------------------------------------------------------------------------------------------------------------------------------------|-------------------------------------------------------------------------------------------------------------------------------------------------------------------------------------------------------------------------------------------------------------------------------------------------------------------------------------------------------------------------------------------------------------------------------------------------------|
|           | <b>Food Security</b>                                                                                                                                        |                                                                                                                                                                                                                                                                                                                                                                                                                                                       |
|           | "I worried whether our food would run-out."                                                                                                                 | <p>Please for each statement/question whether the statement/question was often, sometimes, or never in the last 12 months.</p> <p>Choose from:</p> <ul style="list-style-type: none"> <li>- Often</li> <li>- Sometimes</li> <li>- Never</li> </ul>                                                                                                                                                                                                    |
|           | "The food that we produced just didn't last, and we didn't have money to get more."                                                                         |                                                                                                                                                                                                                                                                                                                                                                                                                                                       |
|           | "We couldn't afford to eat balanced meals."                                                                                                                 |                                                                                                                                                                                                                                                                                                                                                                                                                                                       |
|           | "We couldn't feed the children a balanced meal because we couldn't afford that."                                                                            |                                                                                                                                                                                                                                                                                                                                                                                                                                                       |
|           | In the last 12 months, did you ever eat less than you felt you should because there wasn't enough food?                                                     |                                                                                                                                                                                                                                                                                                                                                                                                                                                       |
|           | In the last 12 months, were you ever hungry but didn't eat because there wasn't enough food?                                                                |                                                                                                                                                                                                                                                                                                                                                                                                                                                       |
|           | In the last 12 months, did you or other adults in your household ever not eat for a whole day because there wasn't Enough money for food?                   |                                                                                                                                                                                                                                                                                                                                                                                                                                                       |
|           | In the last 12 months, did you ever cut the size of any of the children's meals because there wasn't enough food?                                           |                                                                                                                                                                                                                                                                                                                                                                                                                                                       |
|           | <b>Food Sufficiency</b>                                                                                                                                     |                                                                                                                                                                                                                                                                                                                                                                                                                                                       |
|           | Which of these statements best describes the food eaten in your household in the last 12 months:                                                            | <p><u>Please read the statements and ask the respondent to select his/her best choice</u></p> <ul style="list-style-type: none"> <li>- We always have enough to eat and the kinds of food we want;</li> <li>- We have enough to eat but not always the kinds of food we want;</li> <li>- Sometimes we don't have enough to eat; or</li> <li>- Often we don't have enough to eat?</li> </ul>                                                           |
|           | Here are some reasons why people don't always have enough to eat. For each one, please tell me if that is a reason why You don't always have enough to eat. | <p><u>Multiple responses allowed</u></p> <ul style="list-style-type: none"> <li>- Agriculture low production</li> <li>- Agriculture post-harvest loss</li> <li>- Not enough money/income for food</li> <li>- Lack of water</li> <li>- No access to cooking energy source</li> <li>- Too hard to get to the store</li> <li>- Drought</li> <li>- Theft</li> <li>- Not able to cook or eat because of health problems;</li> <li>- Other, name</li> </ul> |



## SECTION 4: WEF TECHNOLOGICAL INNOVATIONS AND PRACTICES

In the specified field: 1) Indicate the WEF technological innovations and practices use are currently using; 2) indicate how you are using them, 3) mention the related benefits, and 4) mention the related challenges.

The purpose this Section is to understand each WEF components and relationships among the component parts found within the WEF system. This will help explain, better understand, and explore research subjects' opinions, behavior, experiences, phenomenon, etc.

### Section 4.1: Water Technological Innovations and Practices

| Numbering | Water technological Innovation and Practices<br>Choose from the list as dictated by the respondent |                                                                                                                                          | Details about the utilized technological Innovation and Practices<br>(Required to fill-in/Question) |                                                                                 |                                                                                             | Prioritization <sup>5</sup>                                             |
|-----------|----------------------------------------------------------------------------------------------------|------------------------------------------------------------------------------------------------------------------------------------------|-----------------------------------------------------------------------------------------------------|---------------------------------------------------------------------------------|---------------------------------------------------------------------------------------------|-------------------------------------------------------------------------|
|           | Indicate the sub-category as per WEF nexus                                                         | Utilized technological Innovation and Practices                                                                                          | Indicate how you are using the Water technological Innovation and Practice                          | Give us the reasons why you are using the technological Innovation and Practice | Give us the challenges you are experiencing using the technological Innovation and Practice | Rank the perceived benefit of the technological Innovation and Practice |
|           | Rainwater                                                                                          | Water harvesting using large dams                                                                                                        |                                                                                                     |                                                                                 |                                                                                             |                                                                         |
|           |                                                                                                    | Water harvesting using small dams (i.e., for agriculture)                                                                                |                                                                                                     |                                                                                 |                                                                                             |                                                                         |
|           |                                                                                                    | Household storage (e.g., jojo tanks).                                                                                                    |                                                                                                     |                                                                                 |                                                                                             |                                                                         |
|           | Groundwater                                                                                        | Water detection: XXX technologies (i.e., Allen technology)                                                                               |                                                                                                     |                                                                                 |                                                                                             |                                                                         |
|           |                                                                                                    | Water drawing: Wind/Solar powered boreholes                                                                                              |                                                                                                     |                                                                                 |                                                                                             |                                                                         |
|           |                                                                                                    | Artificial Groundwater recharge into confined aquifers for future use                                                                    |                                                                                                     |                                                                                 |                                                                                             |                                                                         |
|           | Water Recycling                                                                                    | Wastewater Treatment with Effective Microorganisms (EM) (i.e., Photosynthetic bacteria, Lactic acid bacteria, Yeast)<br>Grey water reuse |                                                                                                     |                                                                                 |                                                                                             |                                                                         |

<sup>5</sup> The Likert scale used to prioritize the WEF identifies technological Innovation and Practice is: 1 = very poor, 2 = poor, 3 = neutral, 4 = good, 5 = excellent

|  |                                            |                                                                                                                                                                                                                                                                                             |  |  |  |  |
|--|--------------------------------------------|---------------------------------------------------------------------------------------------------------------------------------------------------------------------------------------------------------------------------------------------------------------------------------------------|--|--|--|--|
|  | River streams                              | Digital water monitoring using satellite images – Ability to track in- and out-flows.                                                                                                                                                                                                       |  |  |  |  |
|  | Reducing water loss                        | Maintenance of bulk water storage and distribution networks (e.g., infrastructure routine maintenance and use call centers to log/report leaks for timely repairs)<br>Promoting use of water saving devices in institutions and households (e.g. washing machines, showers, toilet systems) |  |  |  |  |
|  |                                            |                                                                                                                                                                                                                                                                                             |  |  |  |  |
|  | Watergen technology                        | A solution that uses humidity in the air to create clean and fresh drinking water                                                                                                                                                                                                           |  |  |  |  |
|  | Other indigenous innovations and practices |                                                                                                                                                                                                                                                                                             |  |  |  |  |

## Section 4.2: Agriculture and Food Technological Innovations and Practices

| Numbering | Food and Agriculture Innovation and Practices<br>Choose from the list as dictated by the respondent |                                                                                                                                                       | Details about the utilized technological Innovation and Practices<br>(Required to fill-in/Question) |                                                                                 |                                                                                             | Prioritization                                                          |
|-----------|-----------------------------------------------------------------------------------------------------|-------------------------------------------------------------------------------------------------------------------------------------------------------|-----------------------------------------------------------------------------------------------------|---------------------------------------------------------------------------------|---------------------------------------------------------------------------------------------|-------------------------------------------------------------------------|
|           | Indicate the sub-category as per WEF nexus                                                          | Utilized technological Innovation and Practices                                                                                                       | Indicate how you are using the Water technological Innovation and Practice                          | Give us the reasons why you are using the technological Innovation and Practice | Give us the challenges you are experiencing using the technological Innovation and Practice | Rank the perceived benefit of the technological Innovation and Practice |
|           | Conservation agriculture                                                                            | <ul style="list-style-type: none"> <li>- Zero cultivation</li> <li>- Mulching, etc.</li> </ul>                                                        |                                                                                                     |                                                                                 |                                                                                             |                                                                         |
|           | Smart irrigation                                                                                    | <ul style="list-style-type: none"> <li>- Drip irrigation</li> <li>- using handheld devices to measure soil moisture (chameleon technology)</li> </ul> |                                                                                                     |                                                                                 |                                                                                             |                                                                         |

|  |                                            |                                                                                                               |  |  |  |  |
|--|--------------------------------------------|---------------------------------------------------------------------------------------------------------------|--|--|--|--|
|  | Sustainable intensification                | use of:<br>- tunnels,<br>- hydroponics<br>- aquaponics                                                        |  |  |  |  |
|  | Use of disaster related insurance          | Index-based insurance (for floods) (e.g., <a href="http://ibfi.iwmi.org/">http://ibfi.iwmi.org/</a> by IWMI). |  |  |  |  |
|  | Behaviour Change Interventions             | - Innovation platforms<br>- WEF Trainings                                                                     |  |  |  |  |
|  | Other indigenous innovations and practices |                                                                                                               |  |  |  |  |
|  |                                            |                                                                                                               |  |  |  |  |
|  |                                            |                                                                                                               |  |  |  |  |

### Section 4.3: Energy Innovations and Practices

| Numbering | Energy Innovation and Practices<br>Choose from the list as dictated by the respondent |                                                 | Details about the utilized technological Innovation and Practices<br>(Required to fill-in/Question) |                                                                                  |                                                                                  | Prioritization                                                                 |
|-----------|---------------------------------------------------------------------------------------|-------------------------------------------------|-----------------------------------------------------------------------------------------------------|----------------------------------------------------------------------------------|----------------------------------------------------------------------------------|--------------------------------------------------------------------------------|
|           | Indicate the sub-category as per WEF nexus                                            | Utilized technological Innovation and Practices | Indicate how you are using the Innovation and Practice                                              | Give us the reasons why you are using the technological Innovation and Practices | Give us the reasons why you are using the technological Innovation and Practices | Rank the perceived benefit of the Water technological Innovation and Practices |
|           | Biogas digester                                                                       | -                                               |                                                                                                     |                                                                                  |                                                                                  |                                                                                |
|           | Electricity                                                                           | -                                               |                                                                                                     |                                                                                  |                                                                                  |                                                                                |
|           | Firewood                                                                              | -                                               |                                                                                                     |                                                                                  |                                                                                  |                                                                                |
|           | Paraffin                                                                              | -                                               |                                                                                                     |                                                                                  |                                                                                  |                                                                                |
|           | LPG / Gas                                                                             | -                                               |                                                                                                     |                                                                                  |                                                                                  |                                                                                |
|           | Coal                                                                                  | -                                               |                                                                                                     |                                                                                  |                                                                                  |                                                                                |
|           | Solar (PV or Solar water heaters)                                                     | -                                               |                                                                                                     |                                                                                  |                                                                                  |                                                                                |
|           | Wind                                                                                  | -                                               |                                                                                                     |                                                                                  |                                                                                  |                                                                                |
|           | Other indigenous innovations and practices                                            | -                                               |                                                                                                     |                                                                                  |                                                                                  |                                                                                |

## SECTION 5: GOVERNANCE, INSTITUTIONS AND POLICY DIMENSIONS

## SECTION 6: ACCESS TO AND USE OF WEF RESOURCES

### Section 6.1: WEF resource use

| WEF Resource     | Type and source                                                                      | Amount used per day/ month/ season/ year/ crop cycle | Specific use for which resource is used |
|------------------|--------------------------------------------------------------------------------------|------------------------------------------------------|-----------------------------------------|
| Food/Agriculture | Fruit trees                                                                          |                                                      |                                         |
|                  | Fodder                                                                               |                                                      |                                         |
|                  | Vegetables                                                                           |                                                      |                                         |
|                  | Cereals and pulses                                                                   |                                                      |                                         |
|                  | Fodder/ pastures                                                                     |                                                      |                                         |
|                  | Livestock (poultry)                                                                  |                                                      |                                         |
| Energy           | Solar<br>Mains Electricity<br>Wind<br>Biomass<br>(Fuelwood, animal dung, biogas etc) |                                                      |                                         |

|       |                                                                   |  |  |
|-------|-------------------------------------------------------------------|--|--|
|       |                                                                   |  |  |
| Water | Borehole<br>River<br>Roof Harvesting<br>Dam<br>Surface harvesting |  |  |

## Section 6.2: WEF resource access and use rights

| WEF Resource          | Dimension                                                                                                                                   | Is any of the dimension in the previous column an issue of concern<br>Yes / NO | If Yes state, the issue (e.g. Permits, metering, rules, rationing for each of the dimensions) | Further comment if any |
|-----------------------|---------------------------------------------------------------------------------------------------------------------------------------------|--------------------------------------------------------------------------------|-----------------------------------------------------------------------------------------------|------------------------|
| Water                 | Source for Domestic use<br><br>Source for Agricultural use/ irrigation<br>Quantity for Agricultural use/ irrigation                         |                                                                                |                                                                                               |                        |
| Energy                | Type (Solar, wind, thermal etc)<br><br>Regulation on type to use<br>Reliability of supply<br>Cost of alternatives<br>Access to alternatives |                                                                                |                                                                                               |                        |
| Land/ food production | Size of land planted<br>Season of planting                                                                                                  |                                                                                |                                                                                               |                        |

|  |                                                                                                                       |  |  |  |
|--|-----------------------------------------------------------------------------------------------------------------------|--|--|--|
|  | Crop type<br>Amount of water required and used<br>Time of irrigation<br>Zoning restrictions<br>Type of livestock kept |  |  |  |
|--|-----------------------------------------------------------------------------------------------------------------------|--|--|--|

## SECTION 7: FINANCIAL SUPPORT, EXTENSION AND ADOPTION

### Section 7.1: WEF financing

Have you received any financing towards any of the following?

| WEF                | Credit source                                                                         | Yes/No | Specific Purpose on which credit was utilised | Any comment |
|--------------------|---------------------------------------------------------------------------------------|--------|-----------------------------------------------|-------------|
| Water development  | Cooperative<br>Bank<br>Microcredit<br>Family<br>Local saving group<br>Grant (specify) |        |                                               |             |
| Energy development | Cooperative<br>Bank<br>Microcredit<br>Family<br>Local saving group<br>Grant (specify) |        |                                               |             |
| Food production    | Cooperative<br>Bank<br>Microcredit<br>Family<br>Local saving group                    |        |                                               |             |

|  |                 |  |  |  |
|--|-----------------|--|--|--|
|  | Grant (specify) |  |  |  |
|--|-----------------|--|--|--|

## Section 7.2: Communication channels and extension services on WEF technologies

For each of the information sources provide the frequency you have had in the last one year

| Source of information for each WEF              | Source of information                                                                                                               | Yes/ No | How frequent do you receive the information (for each source)     |
|-------------------------------------------------|-------------------------------------------------------------------------------------------------------------------------------------|---------|-------------------------------------------------------------------|
| Energy smart technologies                       | Public extension<br>Private extension<br>Radio<br>Newspaper<br>Online<br>Peers<br>Scientific publication<br>Autonomous (own effort) |         | Daily<br>Weekly<br>Monthly<br>Quarterly<br>Biannually<br>Annually |
| Water Smart technologies                        | Public extension<br>Private extension<br>Radio<br>Newspaper<br>Online<br>Peers<br>Scientific publication<br>Autonomous (own effort) |         |                                                                   |
| Land use for food production smart technologies | Public extension<br>Private extension<br>Radio<br>Newspaper<br>Online                                                               |         |                                                                   |

|  |                                                            |  |  |
|--|------------------------------------------------------------|--|--|
|  | Peers<br>Scientific publication<br>Autonomous (own effort) |  |  |
|--|------------------------------------------------------------|--|--|

### Section 7.3: Players in WEF technology promotion and adoption

| Smart technology | Specific WEF smart innovation                                                                       | Who promotes                                                                                                                                                  | Constraints                                                                                                                                                | Rank the constraints named (Use 1 for the most pressing) |
|------------------|-----------------------------------------------------------------------------------------------------|---------------------------------------------------------------------------------------------------------------------------------------------------------------|------------------------------------------------------------------------------------------------------------------------------------------------------------|----------------------------------------------------------|
| Energy           | Solar<br>Energy saving<br>Wind<br>Any Other                                                         | Public extension<br>Private Extension<br>NGO/ CSO/ CBO<br>Research Organisation<br>Government agency<br>International organisation<br>Autonomous (own effort) | Initial investment cost<br>Maintenance costs<br>Lack of market<br>Lack of knowhow<br>High Cost of alternatives<br>Lack Access to alternatives<br>Any other |                                                          |
| Water use        | Water recycling<br>Water harvesting/ roof harvesting<br>Drip irrigation<br>Hydroponics<br>Any other | Public extension<br>Private Extension<br>NGO/ CSO/ CBO<br>Research Organisation<br>Government agency<br>International organisation<br>Autonomous (own effort) | Initial investment cost<br>Maintenance costs<br>Lack of market<br>Lack of knowhow<br>High Cost of alternatives<br>Lack Access to alternatives<br>Any other |                                                          |
| Land use         | Manuring<br>Cover crops<br>Mulching<br>Zero tillage<br>Climate manipulation /Green houses           | Public extension<br>Private Extension<br>NGO/ CSO/ CBO<br>Research Organisation<br>Government agency                                                          | Initial investment cost<br>Maintenance costs<br>Lack of market<br>Lack of knowhow                                                                          |                                                          |



|  |           |                                                      |                                                                       |  |
|--|-----------|------------------------------------------------------|-----------------------------------------------------------------------|--|
|  | Any other | International organisation<br>Autonomous (own effort | High Cost of alternatives<br>Lack Access to alternatives<br>Any other |  |
|--|-----------|------------------------------------------------------|-----------------------------------------------------------------------|--|

#### Section 7.4: Factors influencing adoption of smart WEF technologies

What has influenced or likely to influence you adopt smart technologies?

| WEF Technology                               | Factor                                                                                                                                                                           | Already influenced? Yes/ no | Likely to influence in future if not using |
|----------------------------------------------|----------------------------------------------------------------------------------------------------------------------------------------------------------------------------------|-----------------------------|--------------------------------------------|
| Energy smart technologies                    | Knowledge/ education<br>Finance<br>Value for environment<br>Social network<br>Peers<br>Family spillovers<br>Market access<br>Grant<br>High returns<br>Cost saving<br>Reliability |                             |                                            |
| Water smart Technologies                     | Knowledge/ education<br>Finance<br>Value for environment<br>Social network<br>Peers<br>Family spillovers<br>Market access<br>Grant<br>High returns<br>Cost saving<br>Reliability |                             |                                            |
| Land use/ food production smart technologies | Knowledge/ education<br>Access to financing<br>Value for environment<br>Social network                                                                                           |                             |                                            |

|  |                                                                                     |  |  |
|--|-------------------------------------------------------------------------------------|--|--|
|  | Peers<br>Family spillovers<br>Market access<br>Grant<br>High returns<br>Cost saving |  |  |
|--|-------------------------------------------------------------------------------------|--|--|

### Section 7.5: Barriers to WEF smart technologies

| WEF resource                | Barrier                                                                                                                                                                                     | Yes / No | Rank the barriers (Use 1 as the most pressing) |
|-----------------------------|---------------------------------------------------------------------------------------------------------------------------------------------------------------------------------------------|----------|------------------------------------------------|
| Energy smart technologies   | Initial cost<br>Technical Knowhow<br>Government regulation and policies<br>Lack of information<br>Lack of capital/ credit<br>Lack of alternatives<br>High cost of alternatives<br>Any other |          |                                                |
| Water Smart technology      | Initial cost<br>Technical Knowhow<br>Government regulation<br>Lack of information<br>Lack of capital/ credit<br>Lack of alternatives<br>High cost of alternatives<br>Any other              |          |                                                |
| Land use smart technologies | Initial cost<br>Technical Knowhow<br>Government regulation<br>Lack of information<br>Lack of capital/ credit<br>Any other                                                                   |          |                                                |

To ensure that the proposed mixed model approach is robust enough, Sections 8, 9 and 10 interview questions are open-ended questions so that in-depth information will be collected.

## SECTION 8: WEF NEXUS TRADE-OFF AND SYNERGIES<sup>6</sup>

| Numbering | Required to fill-in/Question                                                                                                                      | Instruction                                                                        |
|-----------|---------------------------------------------------------------------------------------------------------------------------------------------------|------------------------------------------------------------------------------------|
|           | What are the trade-offs (even potential completion) experienced while enhancing synergies towards attaining simultaneous WEF resource securities? | Please read the statements and ask the respondent to answer to their best ability. |
|           | What are the synergies required to attain simultaneous WEF resource securities?                                                                   |                                                                                    |
|           | Practical experience in water, energy and food interlinkages                                                                                      |                                                                                    |

## SECTION 9: GENERAL KNOWLEDGE ON WEF NEXUS

| Numbering | Required to fill-in/Question                         | Instruction                                                                        |
|-----------|------------------------------------------------------|------------------------------------------------------------------------------------|
|           | What is the meaning of WEF nexus approach?           | Please read the statements and ask the respondent to answer to their best ability. |
|           | What do you understand by the term water security?   |                                                                                    |
|           | What do you understand by the term renewable energy? |                                                                                    |
|           | What do you understand by the term food security?    |                                                                                    |
|           | What do you understand by the term sustainability?   |                                                                                    |

## SECTION 10: SUGGESTED ON WEF NEXUS SOLUTIONS

| Numbering | Required to fill-in/Question                                                     | Instruction                                                                        |
|-----------|----------------------------------------------------------------------------------|------------------------------------------------------------------------------------|
|           | What should be done to eradicate water insecurity?                               | Please read the statements and ask the respondent to answer to their best ability. |
|           | What should be done to eradicate energy scarcity (if any)?                       |                                                                                    |
|           | What should be done to eradicate food insecurity?                                |                                                                                    |
|           | What can be done to overcome the barriers impeding WEF nexus operationalisation? |                                                                                    |

<sup>6</sup> [Naidoo et al. \(2021\) Operationalizing the water-energy-food nexus through the theory of change.](#)

## KEY INFORMANT INTERVIEWS SCHEDULE

### 1. Actor name and mandate

| Sector            | Actor | Mandate | Instruments and tools on access and use of WEF resources |
|-------------------|-------|---------|----------------------------------------------------------|
| Energy            |       |         | Permits<br>Tariffs<br>Education/<br>informational        |
| Water             |       |         |                                                          |
| Land and land use |       |         |                                                          |

2. Do you have coordination mechanism with other sectors (named in 1) at local and national levels?
3. Are there community engagement plans in your sector regarding water use/ energy/ land use
4. What are some of the resource conflicts and grievance redress mechanisms about access, use and control of the WEF resources in your sector and how do you resolve them?
5. How is Environmental, social and climate impact assessment integrated into your planning processes
6. How are financing intermediaries integrated into your planning processes?
7. What incentives do you have regarding scaling of climate smart technologies?
8. Do you have partnership with regard to research, implementation and steering of your mandate?
9. What are your intervention and strategies regarding the following?

| Sector and actor                                     | Access (poverty and equity) | Sustainability (economic, social, and environmental) | Efficiency | Climate change vulnerability (adaptation and mitigation and resilience building) |
|------------------------------------------------------|-----------------------------|------------------------------------------------------|------------|----------------------------------------------------------------------------------|
| Water – Water smart energy systems<br>1.<br>2.<br>3. |                             |                                                      |            |                                                                                  |

|                                                                  |  |  |  |  |
|------------------------------------------------------------------|--|--|--|--|
| Energy – Energy<br>smart water<br>systems<br>1.<br>2.<br>3.      |  |  |  |  |
| Land use=- Water<br>land smart food<br>systems<br>1.<br>2.<br>3. |  |  |  |  |

## Annex 1: Water Innovations and Solutions and Tools: Water-Energy-Food/Agric nexus

Table 1: Supply-side of Water (i.e., Source and distribution<sup>7,8</sup>)

| Water Source        | Solution/Tool <sup>9</sup>                                                                                                                                                                   | Benefit                                                                                                                        | Concerns/Gaps                                                                                                                                                                                                                                                                                                    | Energy source                                                           |
|---------------------|----------------------------------------------------------------------------------------------------------------------------------------------------------------------------------------------|--------------------------------------------------------------------------------------------------------------------------------|------------------------------------------------------------------------------------------------------------------------------------------------------------------------------------------------------------------------------------------------------------------------------------------------------------------|-------------------------------------------------------------------------|
| Rainwater           | Water harvesting using large dams.                                                                                                                                                           | <ul style="list-style-type: none"> <li>Provides wider access to water</li> <li>Opportunity to generate hydro-energy</li> </ul> | <ul style="list-style-type: none"> <li>Dependent on rainfall, and in recent past dam levels are below required levels.</li> <li>Intra- and inter-sharing of water sharing challenges.</li> <li>Lack of distribution and reticulation.</li> <li>Silting of dams (reducing the water carrying capacity)</li> </ul> | <ul style="list-style-type: none"> <li>Gravity</li> </ul>               |
|                     | Water harvesting using small dams (i.e., for agriculture)                                                                                                                                    | <ul style="list-style-type: none"> <li>Increases “water balance”</li> <li>Reduce production cost</li> </ul>                    | <ul style="list-style-type: none"> <li>Lack of resources to construct these small dams (e.g., by the farming community)</li> </ul>                                                                                                                                                                               | <ul style="list-style-type: none"> <li>Gravity</li> </ul>               |
|                     | Household storage (e.g., jojo tanks). Promoting a national policy that requires each private and commercial property to put in place a water storage of a specific size to harvest rainwater | <ul style="list-style-type: none"> <li>Increases “water balance”</li> </ul>                                                    | <ul style="list-style-type: none"> <li>Cost?</li> </ul>                                                                                                                                                                                                                                                          | <ul style="list-style-type: none"> <li>None</li> </ul>                  |
| Ocean Water         | Desalination (thermal, electrical, and pressure distillation)                                                                                                                                | <ul style="list-style-type: none"> <li>Abundance of the ocean water</li> </ul>                                                 | <ul style="list-style-type: none"> <li>How this can be done efficiently</li> <li>Waste management</li> </ul>                                                                                                                                                                                                     | <ul style="list-style-type: none"> <li>Solar/wind/hydropower</li> </ul> |
| Watergen technology | A solution that uses humidity in the air to create clean and fresh drinking water                                                                                                            | <ul style="list-style-type: none"> <li>Abundance of water in the atmosphere</li> </ul>                                         | <ul style="list-style-type: none"> <li></li> </ul>                                                                                                                                                                                                                                                               | <ul style="list-style-type: none"> <li>Solar</li> </ul>                 |

<sup>7</sup> Linking energy nexus, it will require green mini power stations off the grid and biogas for power generation (reduce low emission)

<sup>8</sup> A construction and civil engineering companies will be engaged as partners

<sup>9</sup> A tool kit box will be developed after proof of concept to allow scaling out and learning

|                                            |                                                                                                                                                                                                                                                                                             |                                                                                                                                                                                                                                                      |                                                                                                                                                                                                                              |                                                                         |
|--------------------------------------------|---------------------------------------------------------------------------------------------------------------------------------------------------------------------------------------------------------------------------------------------------------------------------------------------|------------------------------------------------------------------------------------------------------------------------------------------------------------------------------------------------------------------------------------------------------|------------------------------------------------------------------------------------------------------------------------------------------------------------------------------------------------------------------------------|-------------------------------------------------------------------------|
| <del>Underground</del><br>WaterGroundwater | Water detection: XXX technologies (i.e., Allen technology)                                                                                                                                                                                                                                  | <ul style="list-style-type: none"> <li>Independent from the mains water supply</li> <li>Borehole water supplies are sustainable in even drought conditions</li> <li>Independent from the mains water supply – no water charge/cost saving</li> </ul> | <ul style="list-style-type: none"> <li>Water quality and safety: Contamination of aquifers (e.g., from pit latrines, agriculture (fertilizers, insecticides, etc.))</li> <li>Over abstraction of the ground water</li> </ul> | <ul style="list-style-type: none"> <li>Solar/wind/hydropower</li> </ul> |
|                                            | Water drawing: Wind/Solar powered boreholes                                                                                                                                                                                                                                                 |                                                                                                                                                                                                                                                      |                                                                                                                                                                                                                              | <ul style="list-style-type: none"> <li>Wind/Solar</li> </ul>            |
|                                            | Artificial Groundwater recharge into confined aquifers for future use                                                                                                                                                                                                                       |                                                                                                                                                                                                                                                      |                                                                                                                                                                                                                              |                                                                         |
| Water Recycling                            | Wastewater Treatment with Effective Microorganisms (EM) (i.e., Photosynthetic bacteria, Lactic acid bacteria, Yeast)                                                                                                                                                                        | <ul style="list-style-type: none"> <li>Increases “water balance”</li> </ul>                                                                                                                                                                          | <ul style="list-style-type: none"> <li>Effectiveness of the water cleaning solution may be questionable</li> </ul>                                                                                                           | <ul style="list-style-type: none"> <li>Solar/Hydropower</li> </ul>      |
| River streams                              | Digital water monitoring using satellite images – Ability to track in- and out-flows.                                                                                                                                                                                                       | <ul style="list-style-type: none"> <li>Solve water allocation</li> </ul>                                                                                                                                                                             | <ul style="list-style-type: none"> <li>Water sharing challenges (upstream v/s downstream conflicts)</li> <li>Drought</li> <li>Contamination from industrial waste</li> </ul>                                                 | <ul style="list-style-type: none"> <li>Solar</li> </ul>                 |
| Reducing water loss                        | Maintenance of bulk water storage and distribution networks (e.g., infrastructure routine maintenance and use call centers to log/report leaks for timely repairs)<br>Promoting use of water saving devices in institutions and households (e.g. washing machines, showers, toilet systems) | <ul style="list-style-type: none"> <li>Reduces water loss due to leakages</li> </ul>                                                                                                                                                                 | <ul style="list-style-type: none"> <li></li> </ul>                                                                                                                                                                           | <ul style="list-style-type: none"> <li>Solar/Hydropower</li> </ul>      |



**Table 2: Demand-side of water (users)**

| User type        | Solution/Tool                                                                                                                                                                                                                     | Benefit                                                                                                                                              | Concerns                                                                                              | Energy source                                                           |
|------------------|-----------------------------------------------------------------------------------------------------------------------------------------------------------------------------------------------------------------------------------|------------------------------------------------------------------------------------------------------------------------------------------------------|-------------------------------------------------------------------------------------------------------|-------------------------------------------------------------------------|
|                  | Local wind/solar energy desalination system for irrigation                                                                                                                                                                        | <ul style="list-style-type: none"> <li>Less burdened to the national grid</li> </ul>                                                                 | <ul style="list-style-type: none"> <li>Maintenance and security issues</li> </ul>                     | <ul style="list-style-type: none"> <li>Solar/wind</li> </ul>            |
| Agriculture      | Smart irrigation using handheld devices (chameleon technology)                                                                                                                                                                    | <ul style="list-style-type: none"> <li>Efficient water use</li> </ul>                                                                                | <ul style="list-style-type: none"> <li>Accuracy of these technologies</li> </ul>                      | <ul style="list-style-type: none"> <li>Solar?</li> </ul>                |
|                  | Sustainable intensification (e.g., use of tunnels, hydroponics and aquaponics)                                                                                                                                                    | <ul style="list-style-type: none"> <li>Increased agriculture productivity</li> </ul>                                                                 | <ul style="list-style-type: none"> <li>Cost to establish</li> </ul>                                   | <ul style="list-style-type: none"> <li>Solar/wind/hydropower</li> </ul> |
|                  | Index-based insurance (for floods) (e.g., <a href="http://ibfi.iwmi.org/">http://ibfi.iwmi.org/</a> by IWMI). Can leverage digital weather stations which are becoming accurate and cheaper (and can be used for early warnings). | <ul style="list-style-type: none"> <li>De-risking farmers against climate disasters (here flood)</li> <li>Early warnings for preparedness</li> </ul> | <ul style="list-style-type: none"> <li>Accuracy of the data</li> <li>Lack of such products</li> </ul> | <ul style="list-style-type: none"> <li>Solar</li> </ul>                 |
|                  | Innovation platforms                                                                                                                                                                                                              | <ul style="list-style-type: none"> <li>Long lasting changes due its participatory nature.</li> </ul>                                                 | Representativeness nature of the Innovation Platforms and power dynamics.                             |                                                                         |
| Household use    | Behaviour change and communication (for attitude towards water use)                                                                                                                                                               | <ul style="list-style-type: none"> <li>Long lasting changes due its participatory nature.</li> </ul>                                                 | Sustainability of this changes after implemented BCC interventions                                    |                                                                         |
|                  | Smart use of water (e.g., timed shower, smart flush toilets)                                                                                                                                                                      | <ul style="list-style-type: none"> <li>Reduce household water use and water bill.</li> </ul>                                                         |                                                                                                       |                                                                         |
|                  | Community-based decision-making platforms                                                                                                                                                                                         | <ul style="list-style-type: none"> <li>Increased ownership due to community participation</li> </ul>                                                 | Methodology to achieve total but-in is not know                                                       |                                                                         |
|                  | Water billing                                                                                                                                                                                                                     |                                                                                                                                                      |                                                                                                       |                                                                         |
| Other industries |                                                                                                                                                                                                                                   |                                                                                                                                                      |                                                                                                       |                                                                         |
|                  |                                                                                                                                                                                                                                   |                                                                                                                                                      |                                                                                                       |                                                                         |
